# Supplementary material for: Effects of Extreme Temperatures on Mortality and Hospitalization in Ho Chi Minh City, Vietnam
Source: MDPI journal article supplement (doi:10.3390/ijerph16030432), 2019-02-02

# Comparison of alternative models

Figure S1

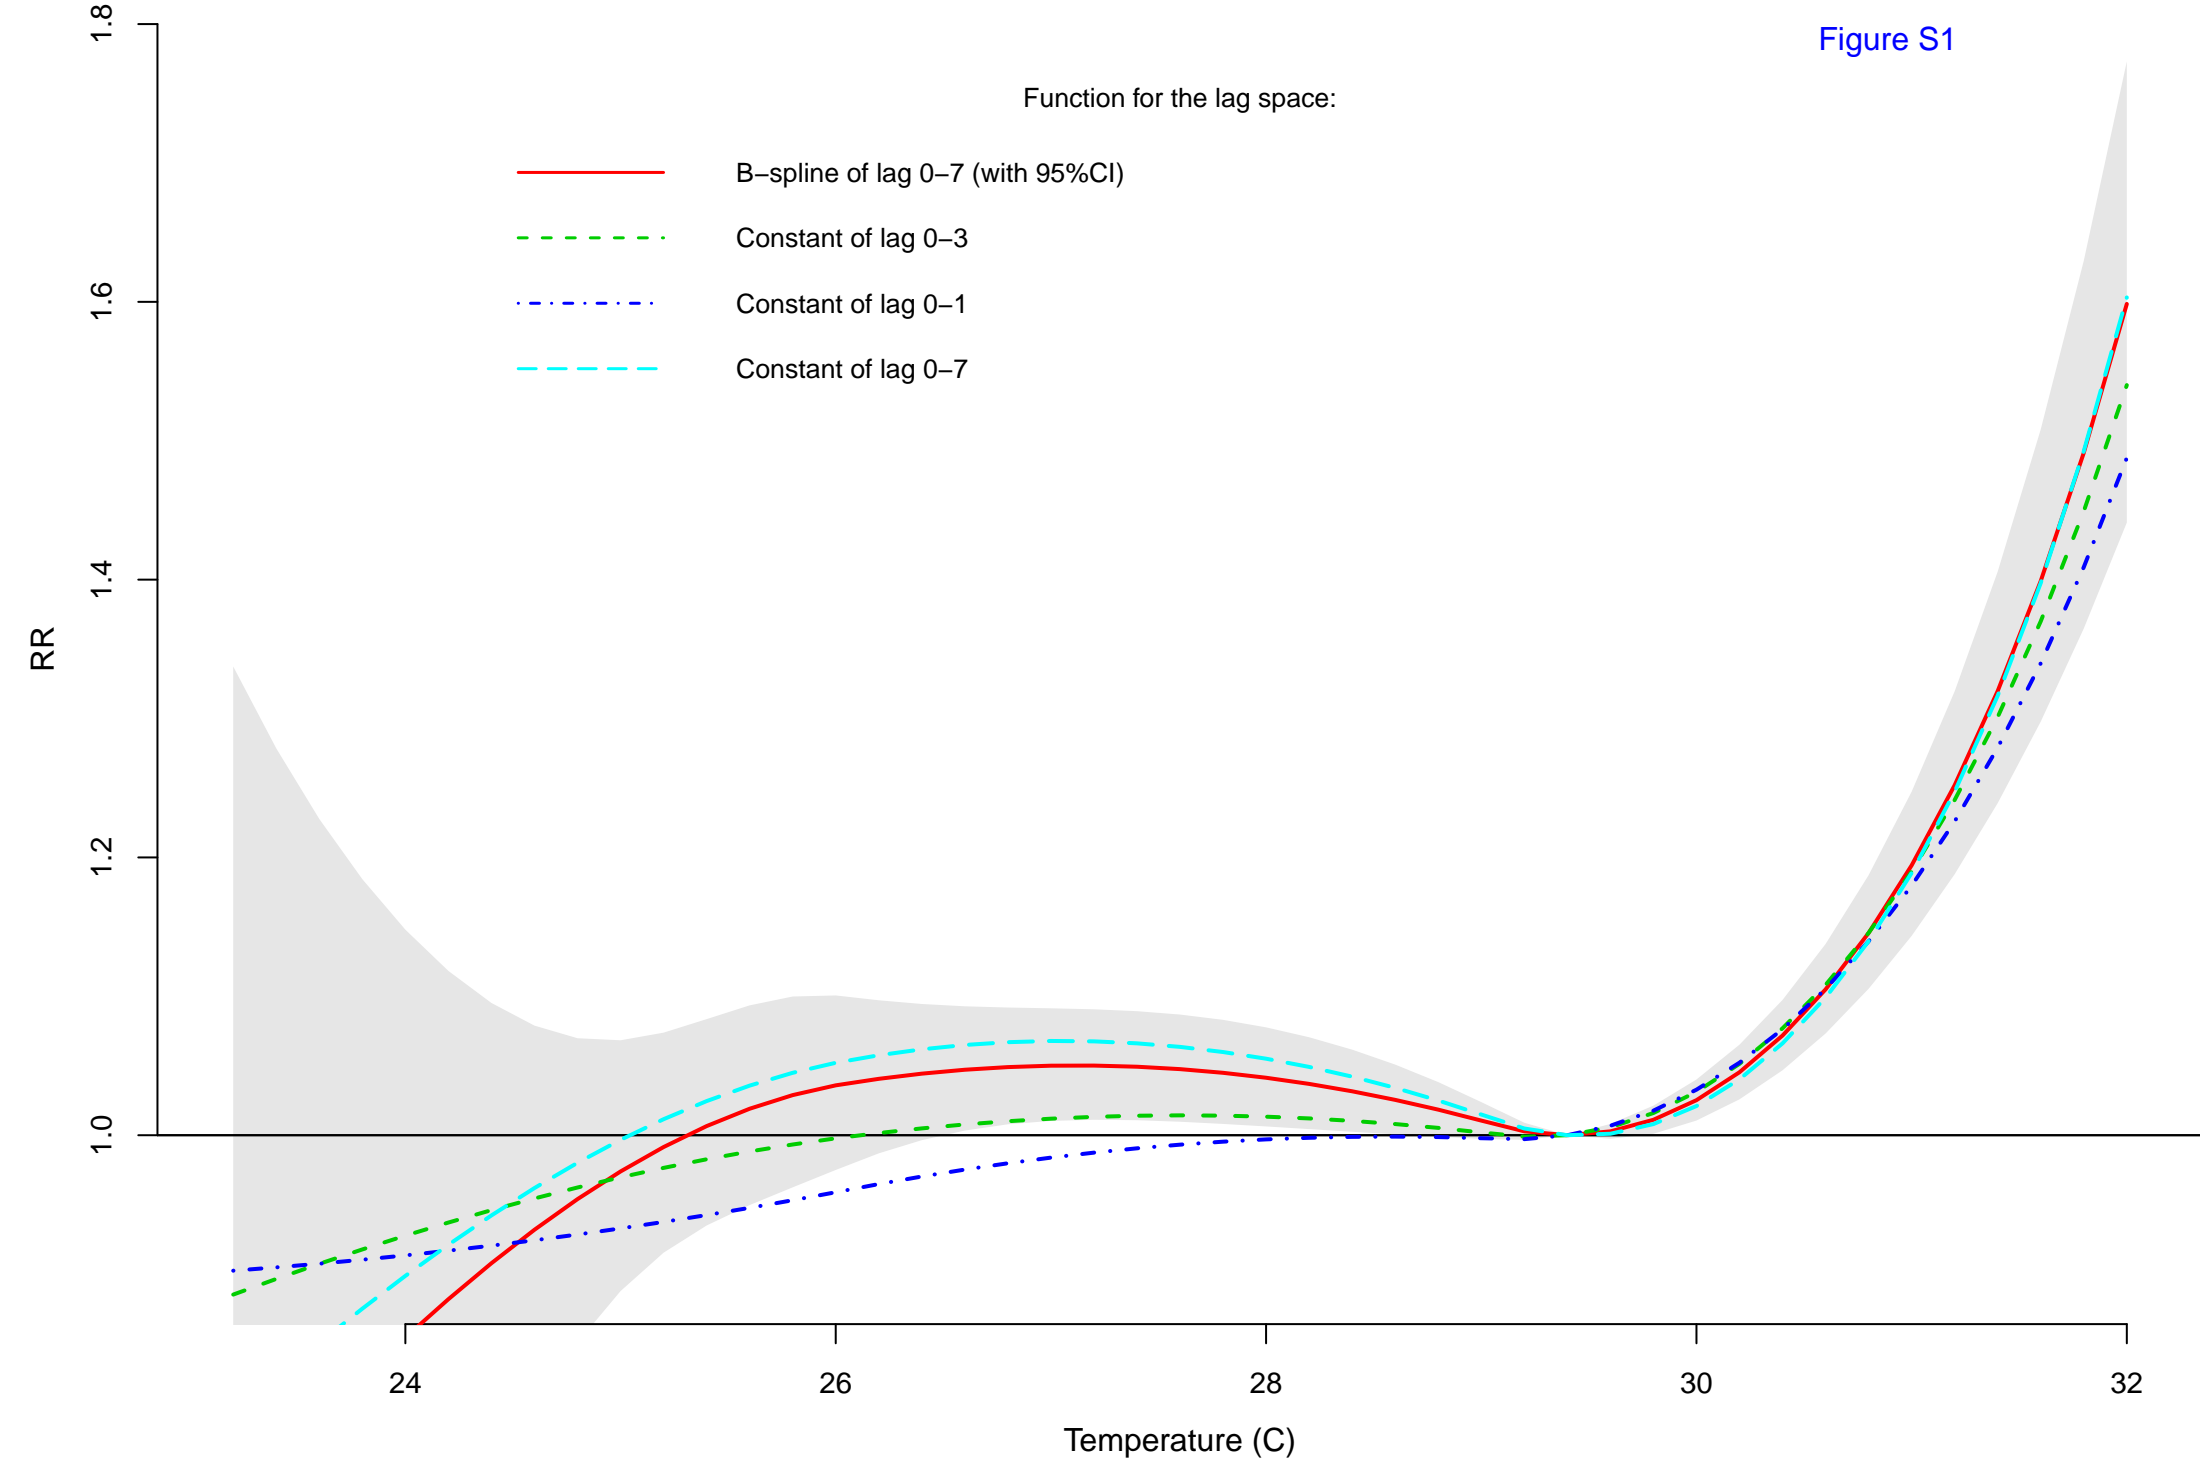

Comparison of alternative models

Figure S2

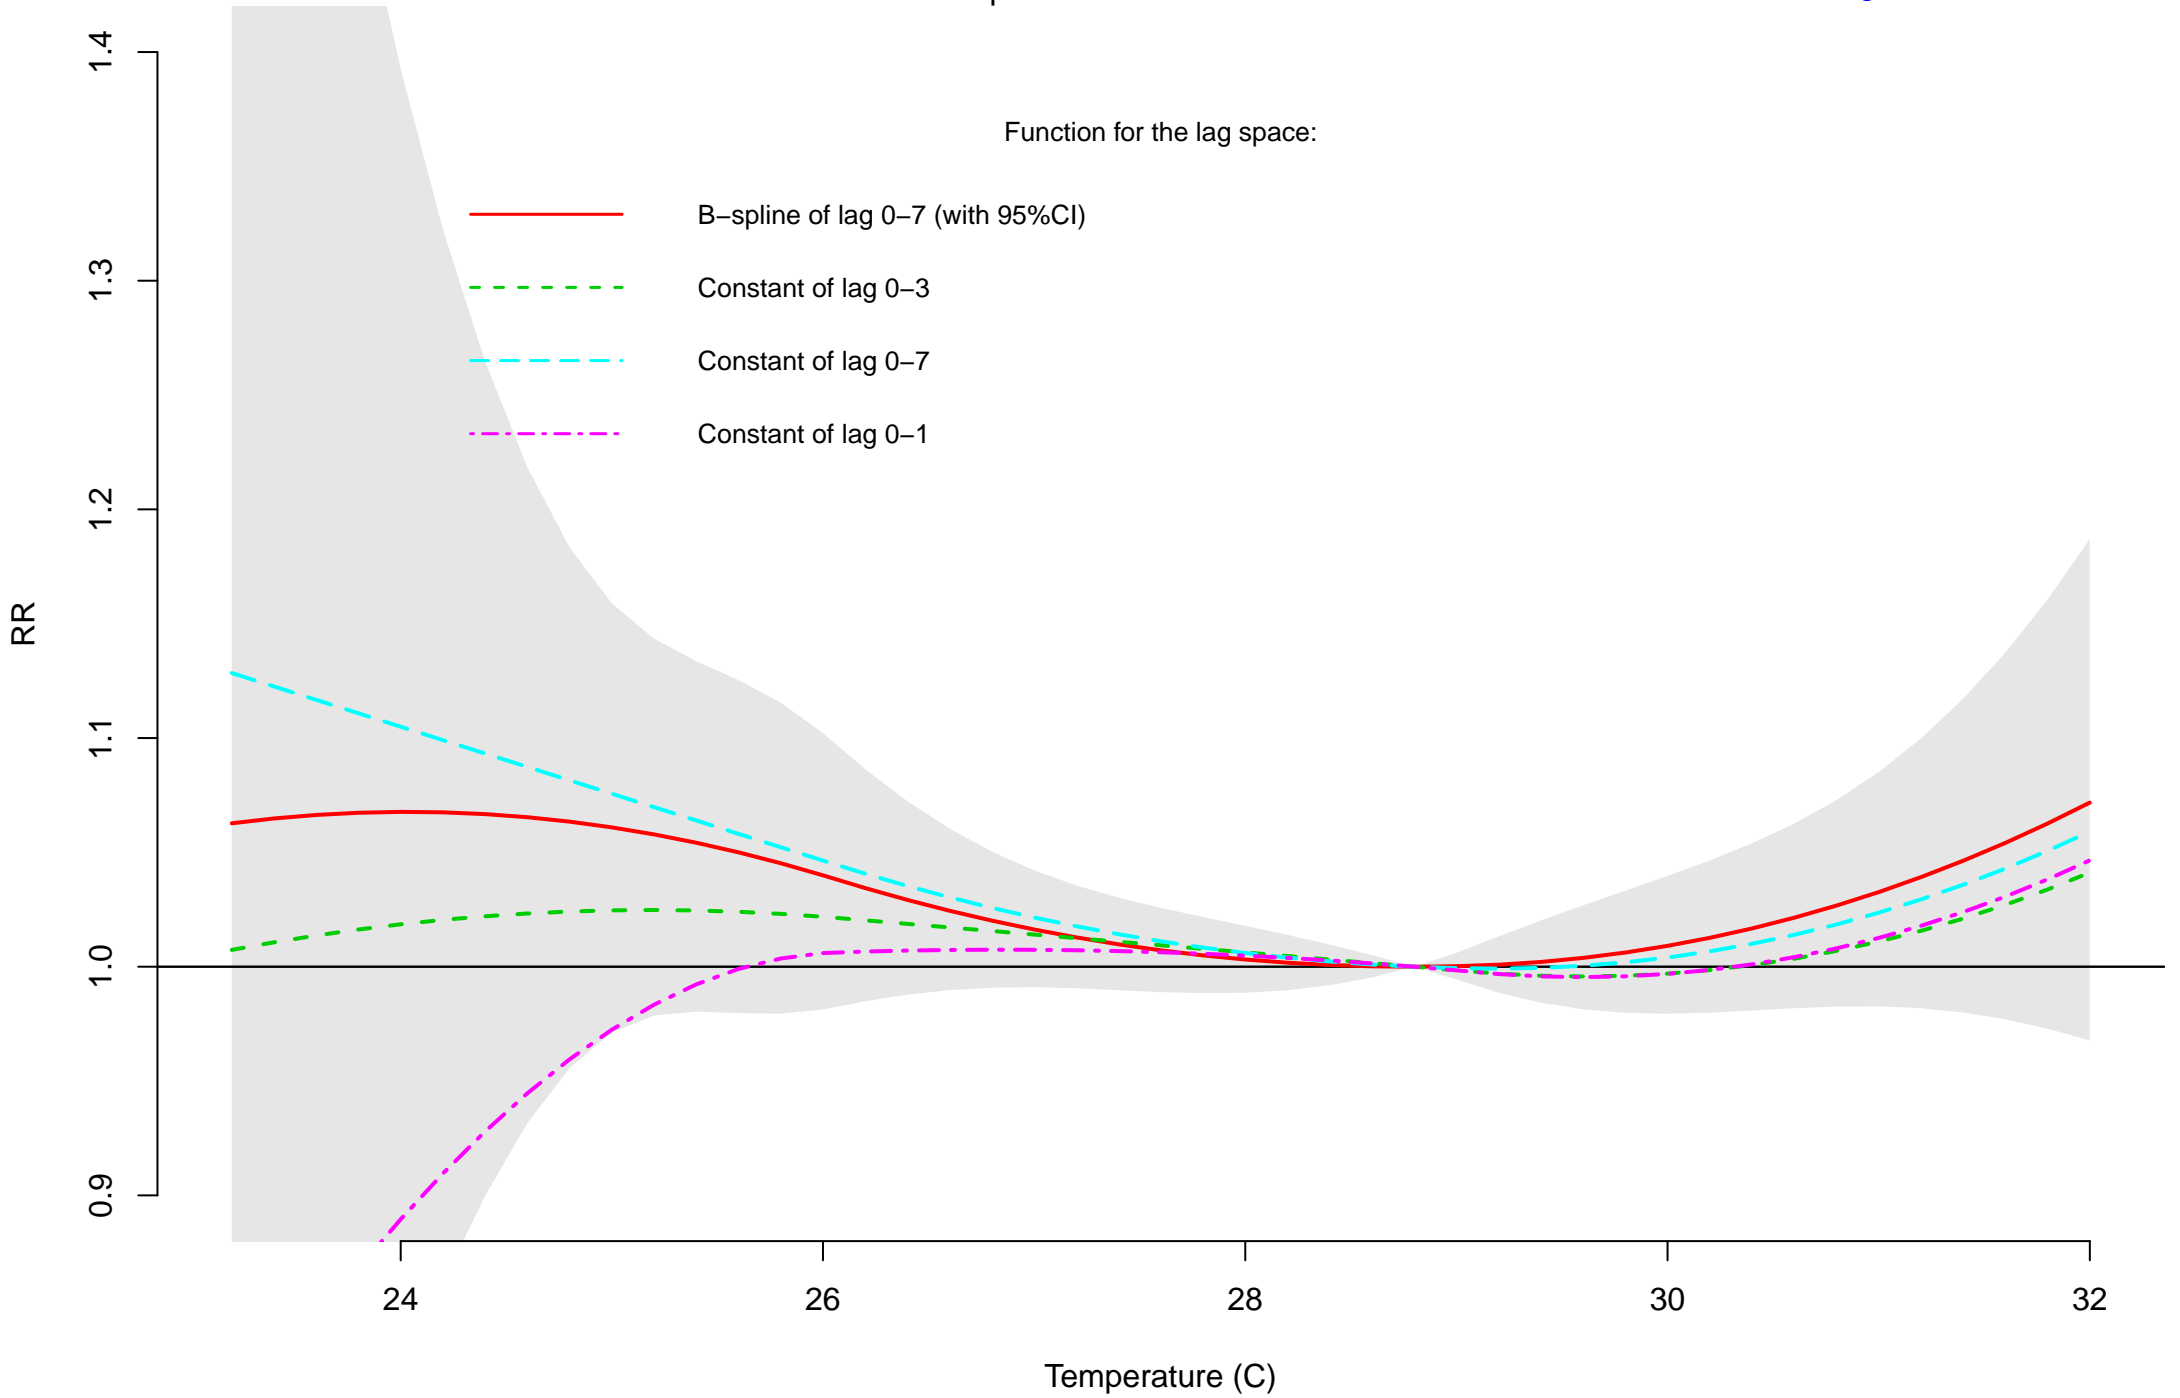

|        | lag.1    | lag.2    | lag.3    | lag.4    |
|--------|----------|----------|----------|----------|
| temp.1 | 11011.45 | 11000.29 | 11004.95 | 11008.12 |
| temp.2 | 11021.66 | 11011.27 | 11017.72 | 11020.19 |
| temp.3 | 11001.38 | 10990.42 | 10991.97 | 10994.48 |
| temp.4 | 11006.96 | 10991.94 | 10999.49 | 11007.52 |

Figure S3a. The Q-AIC values of different combination of number of knots for temperature and lag days

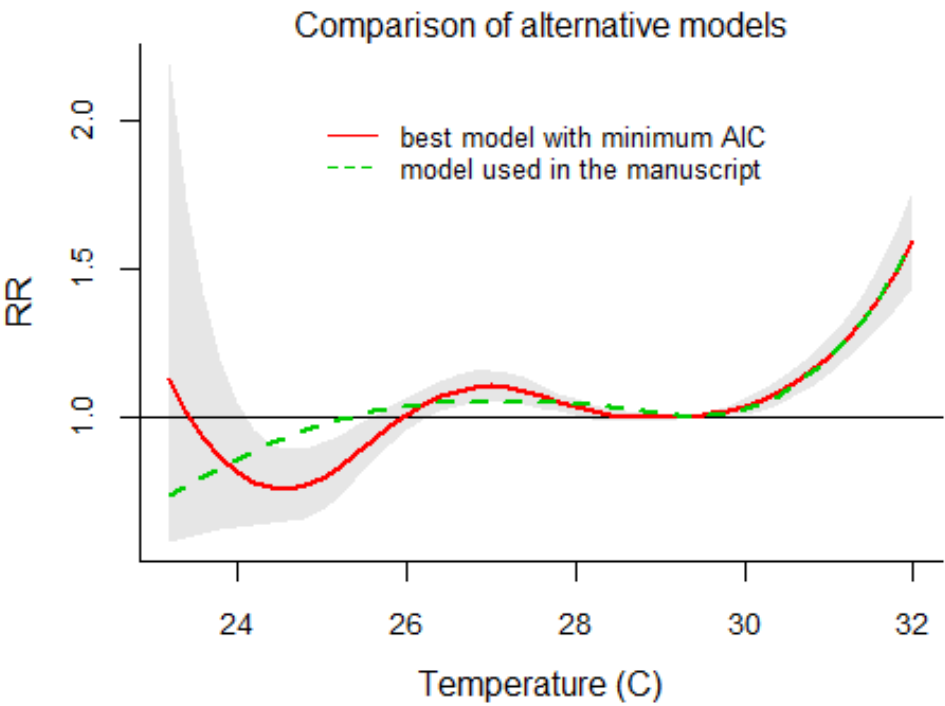

Figure S3b. The comparison overall temperature-mortality association between the best model and the model used in the manuscript.

# Mortality

Figure S4

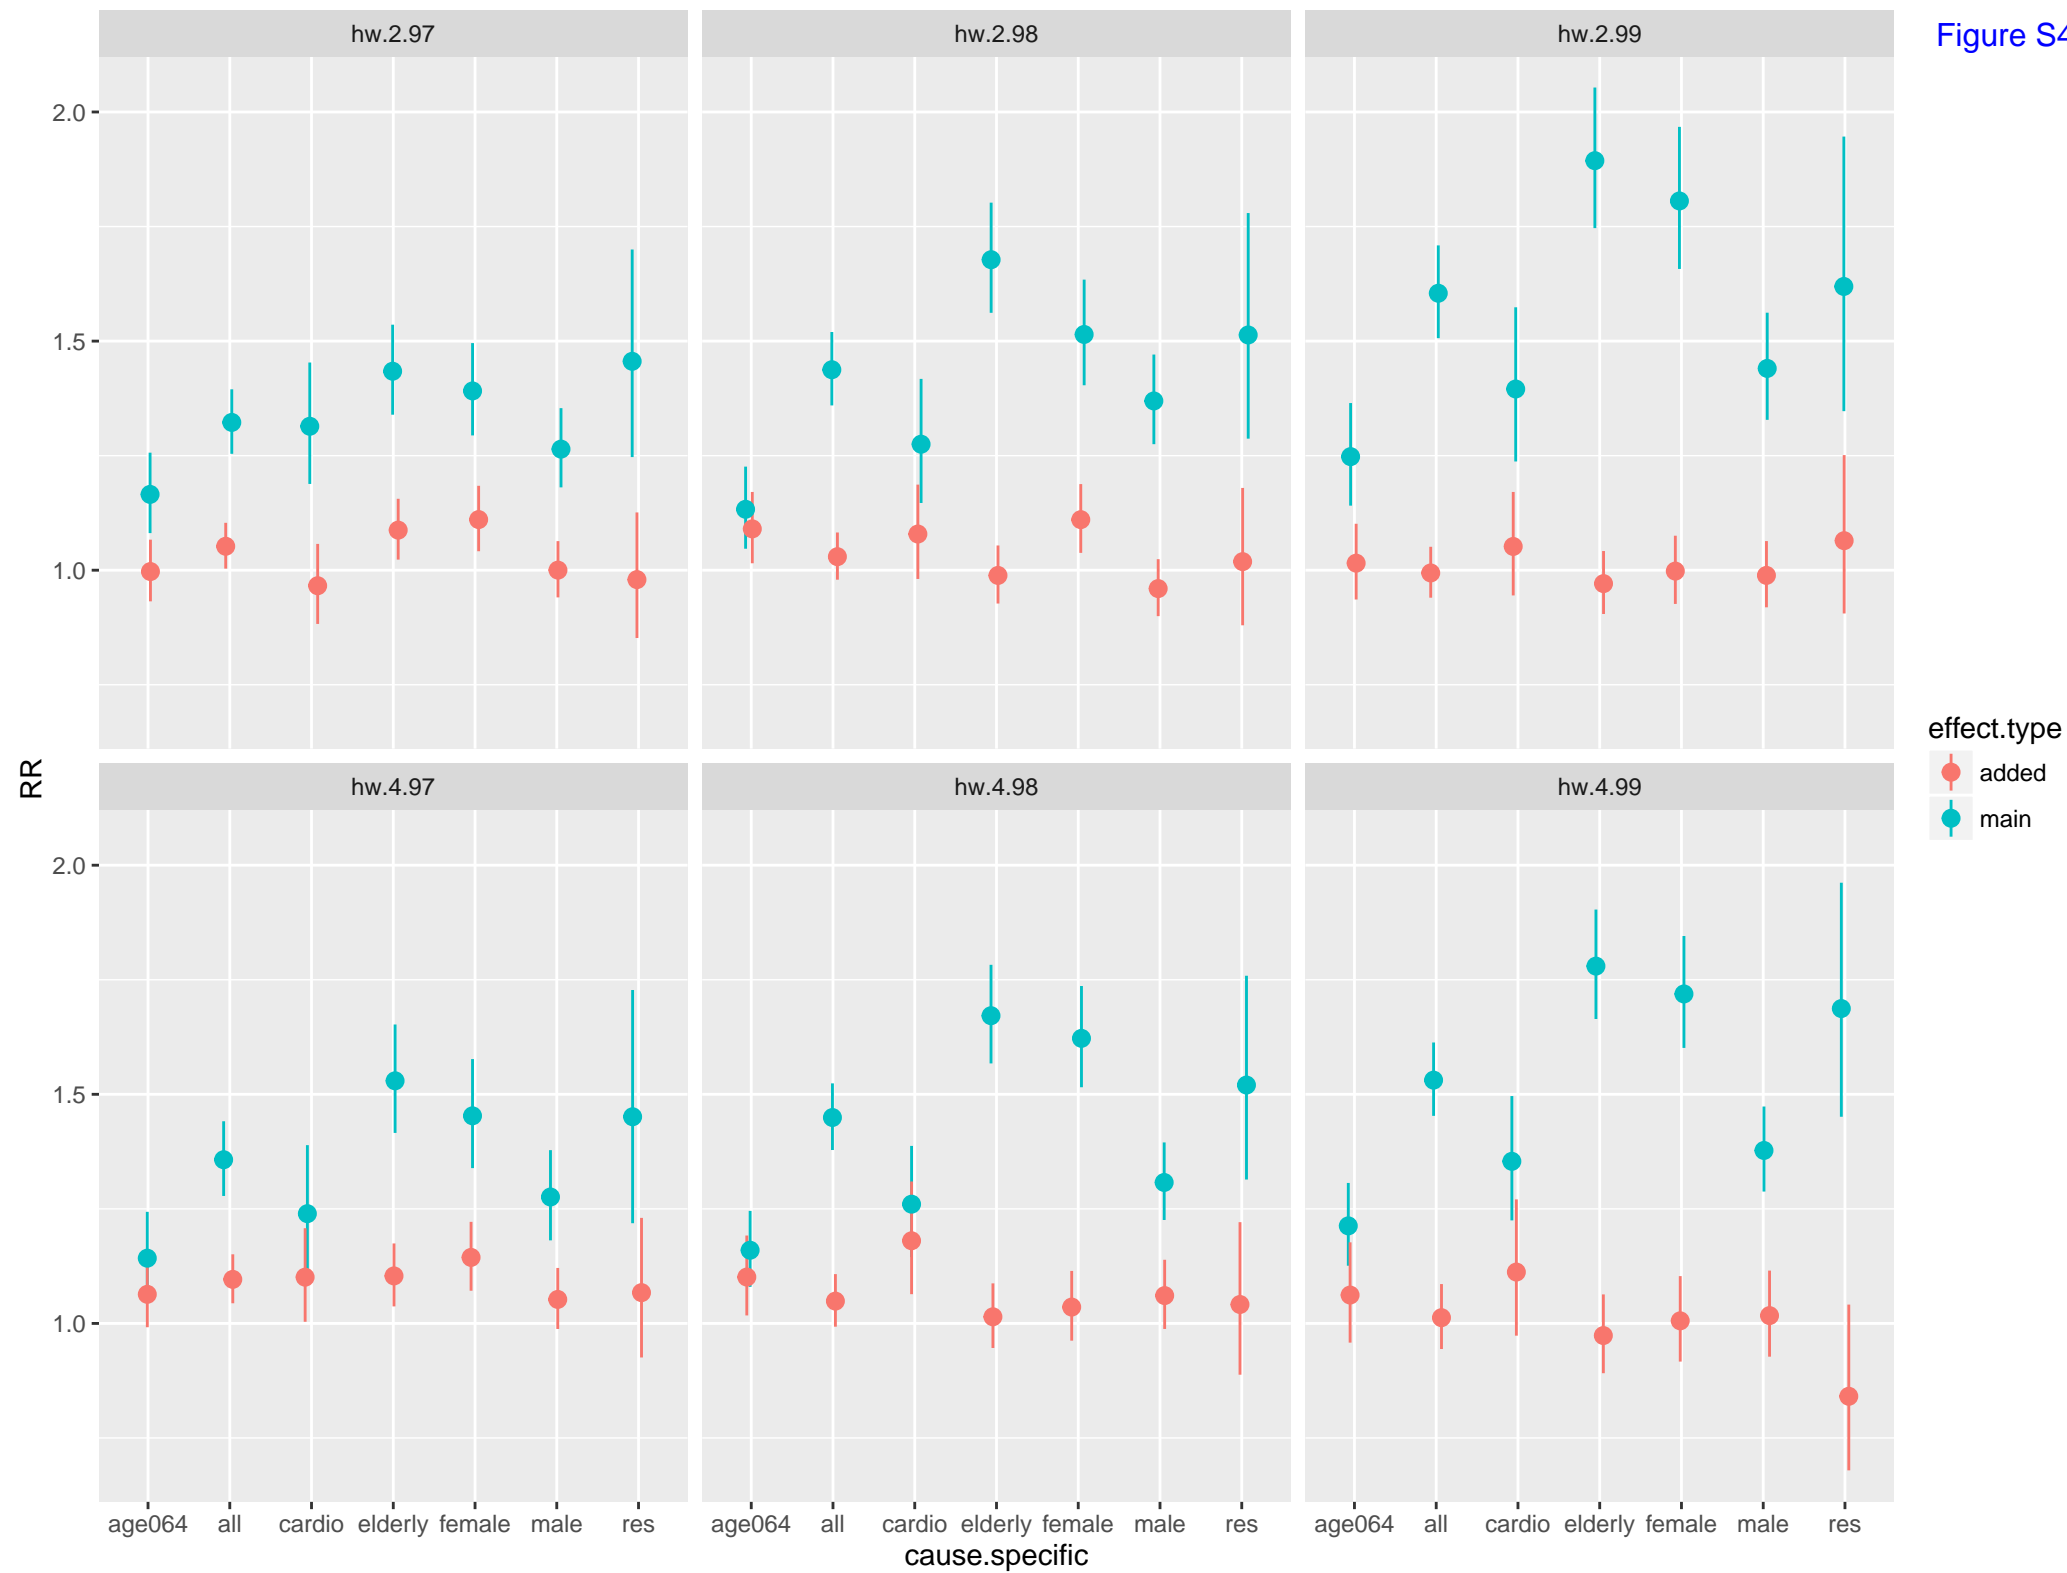

# Hospitalization

Figure S5

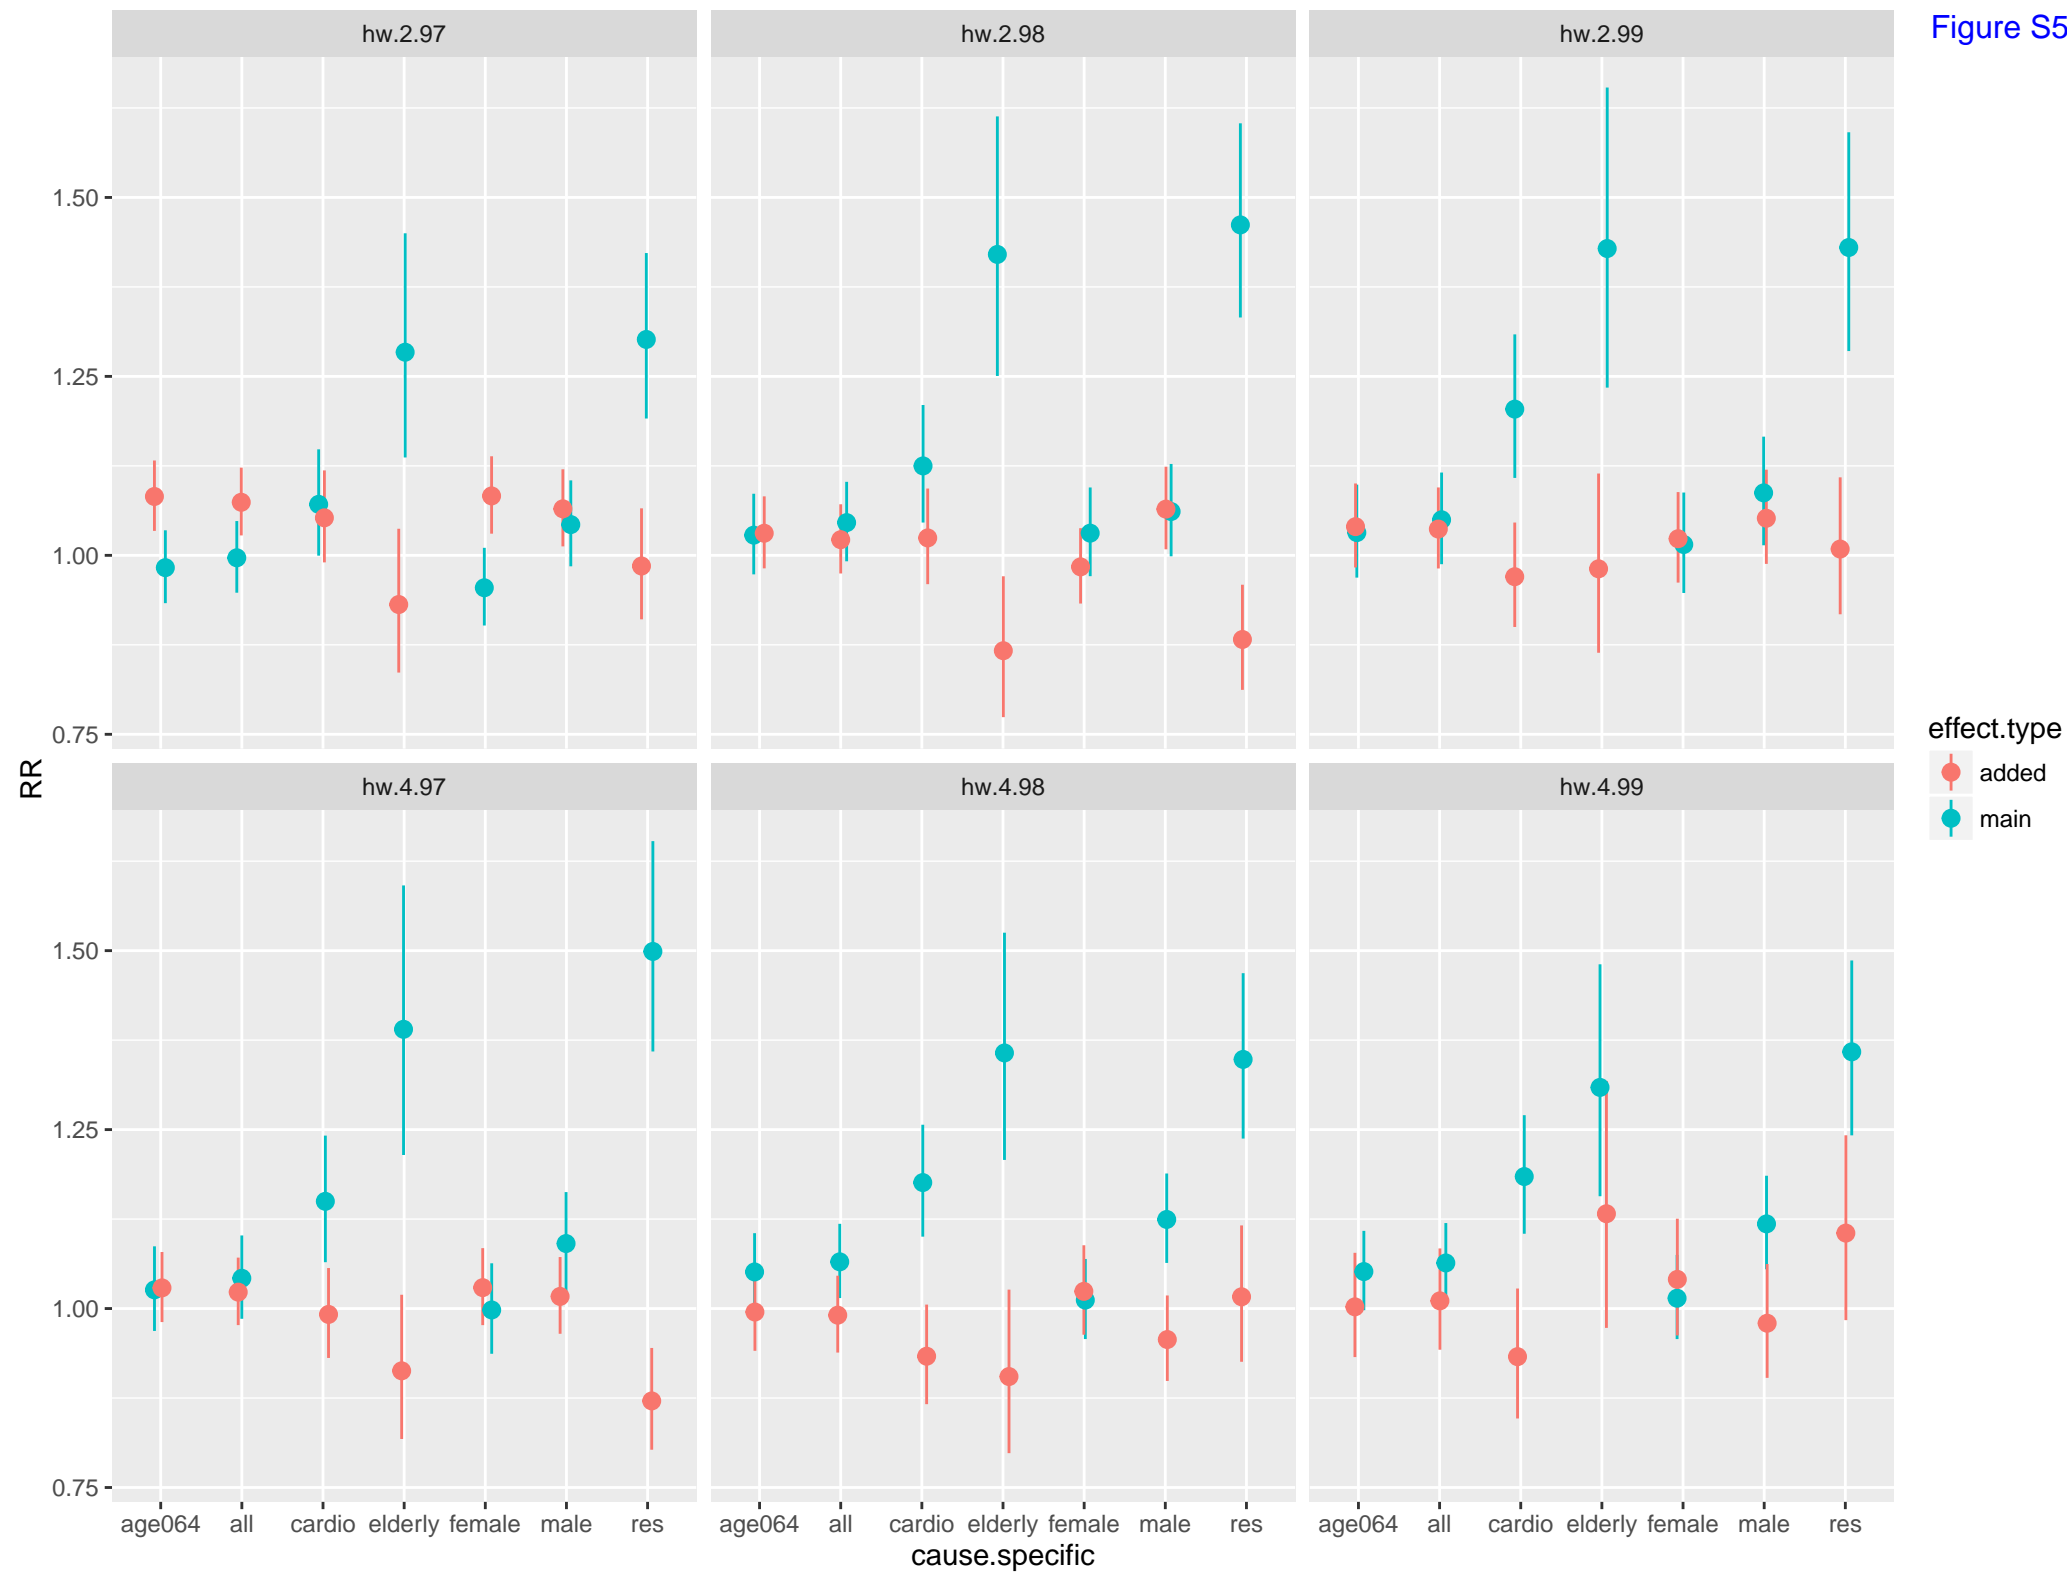

Supplement: s1 [file s1]
